# Supplementary material for: Understanding the impact of dog ownership on autistic adults: implications for mental health and suicide prevention
Source: PubMed Central journal article supplement (PMC8655007; doi:10.1038/s41598-021-02504-8), 2021-12-08
Supplement: 41598_2021_2504_MOESM1_ESM.pdf [file 41598_2021_2504_MOESM1_ESM.pdf]

# Understanding the impact of dog ownership on autistic adults: implications for mental health and suicide prevention

Barcelos, Ana Maria<sup>1</sup>; Kargas, Niko<sup>2</sup>; Packham, Chris<sup>1</sup>; Mills, Daniel S.<sup>1</sup>

<sup>1</sup>School of Life Sciences, University of Lincoln, Lincoln, United Kingdom

<sup>2</sup>School of Psychology, University of Lincoln, Lincoln, United Kingdom

**Table S1.** Activities described to impact on life satisfaction

| <b>Well-being outcome</b>                   | <b>Most frequent subthemes (≥5% mentions) and the most common activity within that subtheme</b>                                                                                                                                                                                                                                                                                                                                                   |
|---------------------------------------------|---------------------------------------------------------------------------------------------------------------------------------------------------------------------------------------------------------------------------------------------------------------------------------------------------------------------------------------------------------------------------------------------------------------------------------------------------|
| Increase in life satisfaction (21 mentions) | <ul style="list-style-type: none"><li>°Exercise with the dog (4; 19.0%)</li><li>°Dog shows good behaviour, training skills (3; 14.3%)</li><li>°Training the dog, doing agility, scent work (3; 14.3%)</li><li>°Tactile interactions initiated by the owner or unclear (3; 14.3%)</li><li>°Having/raising the dog (2; 9.5%)</li><li>°Close dog-owner interactions (2; 9.5%)</li><li>°Tactile interactions initiated by the dog (2; 9.5%)</li></ul> |
| Decrease in life satisfaction (0 mentions)  | No activity has been reported to decrease life satisfaction                                                                                                                                                                                                                                                                                                                                                                                       |

**Table S2.** Characteristics of the 36 participants and their dogs

| <b>Category</b>                       | <b>n</b> | <b>%</b> | <b>Category</b>                   | <b>n</b> | <b>%</b> |
|---------------------------------------|----------|----------|-----------------------------------|----------|----------|
| Sex                                   |          |          | Anxiety (GAD-7)                   |          |          |
| <i>Female</i>                         | 18       | 50.0%    | <i>No symptoms</i>                | 1        | 2.8%     |
| <i>Male</i>                           | 18       | 50.0%    | <i>Minimal</i>                    | 2        | 5.6%     |
| Age (in years)                        |          |          | <i>Mild</i>                       | 15       | 41.7%    |
| 18-24                                 | 5        | 13.9%    | <i>Moderate</i>                   | 7        | 19.4%    |
| 25-34                                 | 14       | 38.9%    | <i>Severe</i>                     | 11       | 30.6%    |
| 35-44                                 | 7        | 19.4%    | Number of dogs owned              |          |          |
| 45-54                                 | 6        | 16.7%    | 1                                 | 23       | 63.9%    |
| 55-54                                 | 3        | 8.3%     | 2                                 | 8        | 22.2%    |
| 65-74                                 | 1        | 2.8%     | 3 or more                         | 5        | 13.9%    |
| Location in the UK                    |          |          | Sex of the dog*                   |          |          |
| <i>England</i>                        |          |          | <i>Female</i>                     | 20       | 55.6%    |
| <i>East Midlands</i>                  | 4        | 11.1%    | <i>Male</i>                       | 23       | 63.9%    |
| <i>East of England</i>                | 2        | 5.6%     | Age of the dog*                   |          |          |
| <i>Greater London</i>                 | 5        | 13.9%    | <i>Below 12 months</i>            | 3        | 8.3%     |
| <i>North East England</i>             | 1        | 2.8%     | 1-3 years                         | 16       | 44.4%    |
| <i>North West England</i>             | 5        | 13.9%    | 4-6 years                         | 12       | 33.3%    |
| <i>South East England</i>             | 5        | 13.9%    | 7-9 years                         | 13       | 36.1%    |
| <i>South West England</i>             | 6        | 16.7%    | 10 or more years                  | 5        | 13.9%    |
| <i>West Midlands</i>                  | 2        | 5.6%     | Length of dog ownership*          |          |          |
| <i>Scotland</i>                       | 3        | 8.3%     | <i>Below 12 months</i>            | 4        | 11.1%    |
| <i>Wales</i>                          | 3        | 8.3%     | 1-3 years                         | 19       | 52.8%    |
| Expertise in dog-related field        |          |          | 4-6 years                         | 14       | 38.9%    |
| <i>Yes, e.g., training, behaviour</i> | 6        | 16.7%    | 7-9 years                         | 7        | 19.4%    |
| <i>No</i>                             | 30       | 83.3%    | 10 or more years                  | 4        | 11.1%    |
| Depression (PHQ-9):                   |          |          | Reason for acquiring dog*         |          |          |
| <i>No symptoms</i>                    | 0        | 0.0%     | <i>Autism service dog</i>         | 6        | 16.7%    |
| <i>Minimal</i>                        | 7        | 19.4%    | <i>Other: pet, company, sport</i> | 34       | 94.4%    |
| <i>Mild</i>                           | 12       | 33.3%    | Size of the dog*                  |          |          |
| <i>Moderate</i>                       | 9        | 25.0%    | <i>Small</i>                      | 8        | 22.2%    |
| <i>Moderately severe</i>              | 5        | 13.9%    | <i>Medium</i>                     | 24       | 66.7%    |
| <i>Severe</i>                         | 3        | 8.3%     | <i>Large</i>                      | 9        | 25.0%    |

\* % exceeds 100% in these categories as the 'n' is the number of participants, not dogs.



## Interview guide/script

### Welcome (5 min)

- Hello \_\_\_\_\_. Thank you for joining this interview!
- My name is Ana Maria Barcelos, I am a PhD student at the University of Lincoln.
- As you saw on the information sheet, we are investigating how dog ownership impacts on the well-being of autistic dog owners.
- Today we will talk about the activities you and your dog do and how they influence your mental health.
- The meeting will be audio recorded, but all the information you share here will be anonymised so you don't need to worry about being honest with us.
- Your Amazon voucher will be sent to you via email after this session.
- Feel free to use the toilet during our conversation or ask for a break at any point. Our interview should take around 30 minutes.
- You are unique and your opinion is very important to the research.
- There is no right or wrong, feel free to share your experiences as a dog owner.
- The consent form is already signed. Do you have any question before we start?
- Start audio recording.

### Explanation about what you mean by direct and indirect dog-related activities - PPT slides (2 min)

Any questions?

### Explanation about the four aspects of hedonic well-being and life satisfaction - PPT slides (3 min)

Any questions?

### Exercise 1 (10 min):

Now, I would like you to think about **the four most important dog-related activities to these aspects of well-being (your feelings and your life satisfaction)**. You can write the activities and their well-being outcomes on a piece of paper to help you organise your ideas

\*Remind them that they can talk about both direct and indirect activities, and about positive and negative activities, there are no limitations.

\*Ask additional questions to clarify the activity/well-being outcome described by the participant

### Explanation about the six elements of eudaimonic well-being - PPT slides (3min)

Any questions?

### Exercise 2 (10 min):

Now, we will do something similar to the first exercise, but now I would like you to think about these new elements of well-being. Can you think about **the four most important dog-related activities associated with one or more elements**? You can write the activities and well-being outcomes on a piece of paper if that helps.

\*Remind them that they can talk about both direct and indirect activities, and about positive and negative activities, there are no limitations.

\*Ask additional questions to clarify the activity/well-being outcome described by the participant

Thank you and further information (2 min)

- It was a pleasure to meet you.
- Thank you again for joining this study.
- We had a very nice discussion about dog-related activities and well-being.
- I am very happy with the information you provided, I am sure it will be very useful to our research.
- I will send you the Amazon voucher via email in a few minutes.
- Do you have any question before we finish the call?
- Bye. Have a lovely day.
